# Supplementary material
Source: publisher figshare collection journal article supplement (https://frontiersin.figshare.com/ndownloader/files/14243300)

**Supplemental Figure 2.** Differentially expressed transcripts at 0 dpi/517 ddpv (A), 8 dpi/605 ddpv (B), and 29 dpi/836 ddpv (C), obtained using either *edgeR* or *DESeq2* pipelines.

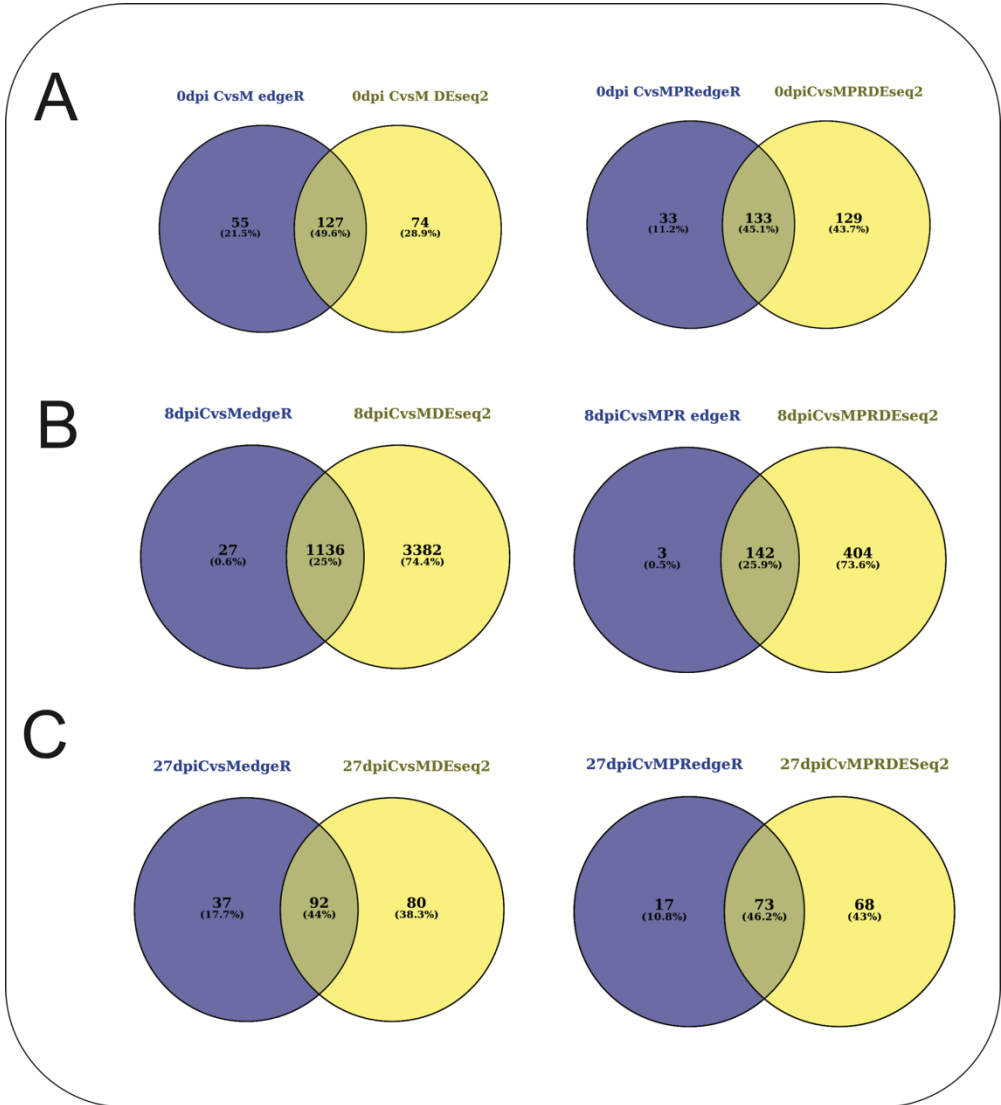

Supplement: Supplementary file [file 14243300]
